# Supplementary material for: Electron-rich biochar enhanced Z-scheme heterojunctioned bismuth tungstate/bismuth oxyiodide removing tetracycline
Source: Royal Society of Chemistry journal article supplement (doi:10.1039/d3qi01283b), 2023-01-01
Supplement: d3qi01283b1.pdf [file d3qi01283b1.pdf]

*Supporting information for:*

**Electron-rich biochar enhanced Z-scheme heterojunctioned  
bismuth tungstate/ bismuth oxyiodide removing tetracycline**

Fuyan Kang<sup>a,#</sup>, Xiaona Jiang<sup>a,#</sup>, Yao Wang<sup>a</sup>, Juanna Ren,<sup>b,c</sup> Ben Bin Xu,<sup>b</sup> Guoyang Gao<sup>a</sup>, Zhanhua Huang<sup>a,\*</sup>, Zhanhu Guo<sup>b,\*</sup>

<sup>a</sup> Key Laboratory of Bio-based Material Science and Technology, Ministry of Education, Material Science and Engineering College, Northeast Forestry University, Harbin 150040, Heilongjiang, China

<sup>b</sup> Mechanical and Construction Engineering, Faculty of Engineering and Environment, Northumbria University, Newcastle Upon Tyne, NE1 8ST, UK

<sup>c</sup> College of Materials Science and Engineering, Taiyuan University of Science and Technology, Taiyuan, 030024, China

<sup>†</sup>These authors contributed equally.

\*Corresponding authors.

E-mail addresses: huangzh1975@163.com (Z. Huang),  
zhanhu.guo@northumbria.ac.uk (Z. Guo).

## Experimental Sections

### Characterization.

The morphologies of the synthesized samples were characterized by field emission scanning electron microscopy (FE-SEM) (S-3400, Hitachi, Japan), transmission electron microscopy (TEM) and high-resolution transmission electron microscopy (HRTEM) (JEM-2100, JEOL, Japan) at an accelerating voltage of 200 kV. X-ray diffraction (XRD) (D/max-2200VPC, Rigaku, Japan) was performed to determine the crystal structures of materials under Cu K $\alpha$  radiation (40 kV, 30 mA) with a scanning range of 10–90° at a speed of 5° min<sup>-1</sup>. Surface element chemical compositions were analyzed by X-ray photoelectron spectroscopy (XPS) (PHI5700, Thermo Electron Corporation, USA) using non-monochromatic Al X-rays as the primary excitation. N<sub>2</sub> adsorption–desorption isotherms and pore-size distributions were studied using a nitrogen adsorption analyzer (ASAP2020, Micromeritics, USA). UV-vis diffuse reflectance spectra (UV-vis DRS) of samples were recorded using a double-beam ultraviolet–visible spectrophotometer (TU-1901, Beijing General Instrument Co., Ltd., China) using BaSO<sub>4</sub> as a reference in the scan range of 200–800 nm. UV-vis spectra were acquired using a UV-vis spectrophotometer (TU-1900, Beijing General Instrument Co., Ltd., China). Photoluminescence (PL) spectra of solid powders were measured using a Cary Eclipse fluorescence spectrophotometer (Agilent Technologies, Australia). Fourier transform infrared (FT-IR) spectra were obtained using a Fourier-transform infrared spectrometer (iS10, Nicolet, USA) scanning from 4000–400 cm<sup>-1</sup> with a resolution of 4 cm<sup>-1</sup>. The glass tube was then inserted into the ESR cavity and

was irradiated under a 300 W Xenon lamp, and the spectra were recorded at selected times. Electron spin resonance (ESR) spectra were recorded at room temperature using a Bruker A200 EPR spectrometer with center field at 3398 G and X-band microwave frequency of 9.45 GHz. The intermediates formed during the photocatalytic reaction of TC over BCs-Bi<sub>2</sub>WO<sub>6</sub> was examined using a liquid chromatography-mass spectrometry (LCMS) coupled with a mass spectrometer (Waters Micromass Q-TOF Micro). Electrochemical impedance spectra (EIS) and photocurrent transient response (I-t) were measured in a three-electrode system on an electrochemical workstation (CHI660E, Shanghai, China). Na<sub>2</sub>SO<sub>4</sub> aqueous solution (0.50 M) was used as the electrolyte. A Pt plate and Ag/AgCl electrode were used as the counter and reference electrode, respectively, while working electrodes were prepared by spreading a slurry of the as-prepared photocatalyst onto fluorine-doped tin oxide (FTO) glass.

### **Preparation of Bi<sub>2</sub>WO<sub>6</sub>**

0.5 mmol Bi(NO<sub>3</sub>)<sub>3</sub>·5H<sub>2</sub>O and 0.5 mmol Na<sub>2</sub>WO<sub>4</sub>·2H<sub>2</sub>O were weighed and dispersed in 30 mL of ethylene glycol solution and stirring for 30 min. The stirred solution was transferred to a hydrothermal reactor and reacted at 140 °C for 14 h. The reacted precipitate is collected and washed and dried.

### **Synthesis of BiOI**

2 mmol of Bi(NO<sub>3</sub>)<sub>3</sub>·5H<sub>2</sub>O and 2 mmol of KI were weighed and dispersed in 30 mL of ethylene glycol. Meanwhile, the dispersed solution was stirred for 30 min. The stirred solution was transferred to a hydrothermal reactor at 140 °C and reacted for 14 h. The reacted precipitate is collected and washed and dried.

## Synthesis of BC

BCs were prepared using high-temperature carbonization and alkaline activation methods. Firstly, wash, dry, and crush the corncob to obtain corncob powder. Then pre carbonize the corn cob powder at 450 °C for 2 h (with a heating rate of 5 °C·min<sup>-1</sup>) and continuously introduce N<sub>2</sub> protection to obtain pre carbonized corn cob charcoal. Then mix pre carbonized corn cob charcoal and KOH in a mass ratio of 1:4, and carbonize at 900 °C for 1 h (heating rate of 5 °C·min<sup>-1</sup>). Finally, wash and dry the above samples with concentrated H<sub>2</sub>SO<sub>4</sub> to obtain BCs.

## Adsorption model

Adsorption kinetics: using the pseudo-first-order model (Eq(S1)) and the pseudo-second-order model (Eq(S2)) to predict the adsorption mechanism of tetracycline (TC) on the catalyst surface. The procedure of the adsorption kinetics experiment was as follows: Take 10 mg of catalyst and added it to 100 mL of TC (50 mg L<sup>-1</sup>), and stirred at 298 K. The decisive step model of catalyst adsorption of TC was fitted by the Intra-particle diffusion model (Eq(S3))

pseudo-first-order model

$$q_t = q_e(1 - e^{-k_1 t}) \quad (S1)$$

Where  $q_t$  is the adsorption capacity of TC at  $t$  (min),  $k_1$  (min<sup>-1</sup>) is the rate constant of pseudo-first-order model.

pseudo-second-order model

$$q_t = \frac{q_e^2 K_2 t}{1 + q_e K_2 t} \quad (S2)$$

Where  $k_2$  is the rate constant of the pseudo-second-order model.

Intra-particle diffusion model

$$q_t = k_{\text{dif}} t^{0.5} + C \quad (\text{S3})$$

Where  $k_{\text{dif}}$  ( $\text{mg g}^{-1} \text{min}^{1/2}$ ) is the rate constant of the intra-particle diffusion model, and  $C$  ( $\text{mg} \cdot \text{g}^{-1}$ ) is the thickness of the boundary layer.

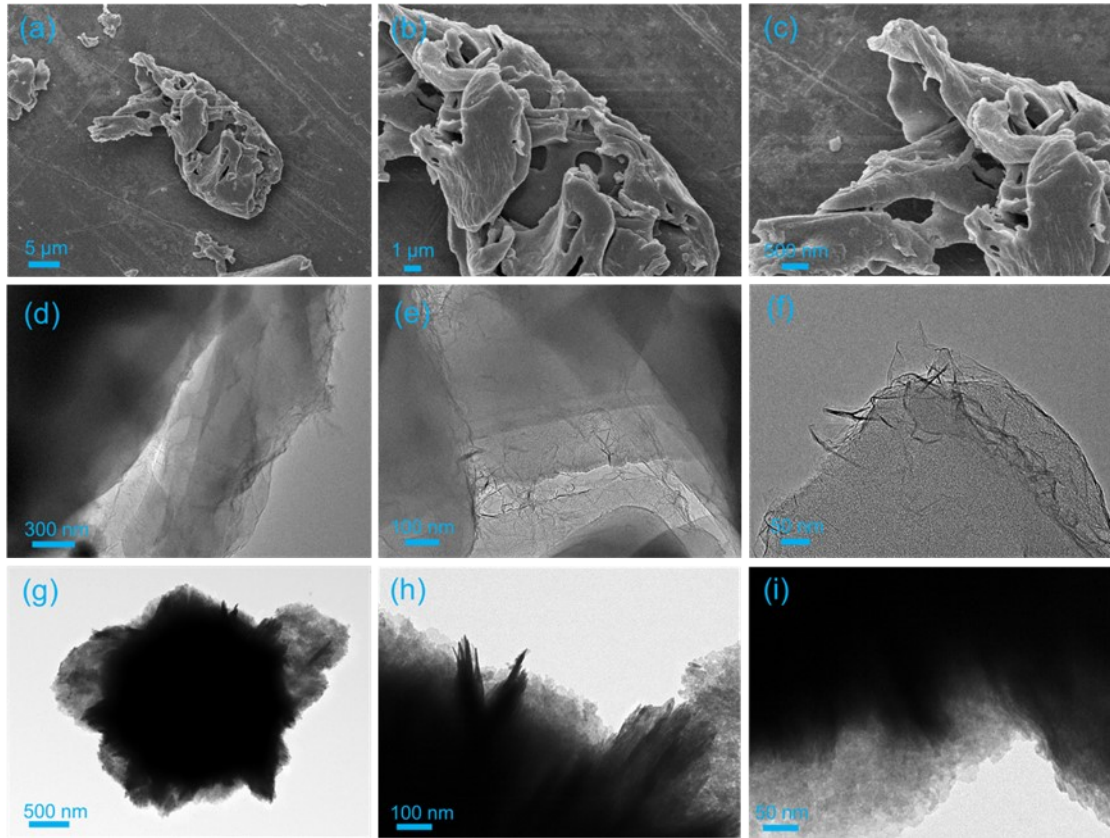

**Fig. S1.** (a-c) SEM images and (d-f) TEM images of BCs. (g-I) TEM images of Bi<sub>2</sub>WO<sub>6</sub>.

**Table S1.** BET surface parameters of Ni@C/ZCS samples.

| Samples                         | Surface parameters                                    |                                                   |                       |
|---------------------------------|-------------------------------------------------------|---------------------------------------------------|-----------------------|
|                                 | BET surface area<br>(m <sup>2</sup> g <sup>-1</sup> ) | Pore volume<br>(cm <sup>3</sup> g <sup>-1</sup> ) | Pore diameter<br>(nm) |
| BiOI                            | 15.40                                                 | 0.04                                              | 34.56                 |
| Bi <sub>2</sub> WO <sub>6</sub> | 29.64                                                 | 0.08                                              | 14.13                 |
| BWI <sub>0.2</sub>              | 61.69                                                 | 0.18                                              | 27.64                 |
| BC                              | 2598.30                                               | 1.21                                              | 2.38                  |
| BC/BWI <sub>0.1</sub>           | 1640.73                                               | 0.94                                              | 2.55                  |
| BC/BWI <sub>0.2</sub>           | 1760.00                                               | 1.04                                              | 2.60                  |
| BC/BWI <sub>0.3</sub>           | 1962.42                                               | 1.15                                              | 2.57                  |
| BC/BWI <sub>0.4</sub>           | 2358.99                                               | 1.37                                              | 2.49                  |

**Table S2.** Kinetic parameters of BC/BWI for removal of tetracycline

| Adsorbates   | Samples               | $q_{e,exp}(\text{mg g}^{-1})$ | Pseudo-first-order model      |                        |       |       | Pseudo-second-order model     |                                         |       |      |
|--------------|-----------------------|-------------------------------|-------------------------------|------------------------|-------|-------|-------------------------------|-----------------------------------------|-------|------|
|              |                       |                               | $q_{e,cal}(\text{mg g}^{-1})$ | $K_1(\text{min}^{-1})$ | $R^2$ | ARE   | $q_{e,cal}(\text{mg g}^{-1})$ | $K_2(\text{g mg}^{-1} \text{min}^{-1})$ | $R^2$ | ARE  |
| Tetracycline | BC/BW                 | 267.27                        | 315.52                        | 0.089                  | 0.994 | 2.86  | 268.20                        | $3.51 \times 10^{-4}$                   | 0.999 | 0.42 |
|              | BC/BWI <sub>0,1</sub> | 233.69                        | 286.17                        | 0.078                  | 0.995 | 2.35  | 237.09                        | $3.10 \times 10^{-4}$                   | 0.999 | 0.63 |
|              | BC/BWI <sub>0,2</sub> | 227.09                        | 271.58                        | 0.087                  | 0.991 | 3.07  | 229.96                        | $3.92 \times 10^{-4}$                   | 0.998 | 1.12 |
|              | BC/BWI <sub>0,3</sub> | 234.79                        | 256.14                        | 0.078                  | 0.876 | 15.13 | 237.03                        | $3.11 \times 10^{-4}$                   | 0.999 | 0.52 |
|              | BC/BWI <sub>0,4</sub> | 202.59                        | 240.22                        | 0.090                  | 0.992 | 2.96  | 204.24                        | $4.70 \times 10^{-4}$                   | 0.998 | 0.82 |



**Table S3.** Intra-particle diffusion parameters of BC/BWI for removal of tetracycline

| Adsorbates   | Samples               | Intra-particle diffusion parameters           |       |       |      |                                               |        |       |      |
|--------------|-----------------------|-----------------------------------------------|-------|-------|------|-----------------------------------------------|--------|-------|------|
|              |                       | $k_{dif1}(\text{mg g}^{-1} \text{min}^{1/2})$ | $C_1$ | $R^2$ | ARE  | $k_{dif2}(\text{mg g}^{-1} \text{min}^{1/2})$ | $C_2$  | $R^2$ | ARE  |
| Tetracycline | BC/BW                 | 40.96                                         | 31.72 | 0.971 | 3.94 | 4.43                                          | 232.63 | 0.976 | 0.14 |
|              | BC/BWI <sub>0.1</sub> | 38.28                                         | 9.24  | 0.994 | 1.56 | 5.29                                          | 193.60 | 0.878 | 0.47 |
|              | BC/BWI <sub>0.2</sub> | 37.63                                         | 15.28 | 0.996 | 1.99 | 2.91                                          | 204.59 | 0.999 | 0.01 |
|              | BC/BWI <sub>0.3</sub> | 38.95                                         | 6.87  | 0.989 | 1.75 | 6.61                                          | 183.98 | 0.981 | 0.22 |
|              | BC/BWI <sub>0.4</sub> | 32.54                                         | 19.72 | 0.994 | 2.77 | 2.53                                          | 183.14 | 0.989 | 0.07 |

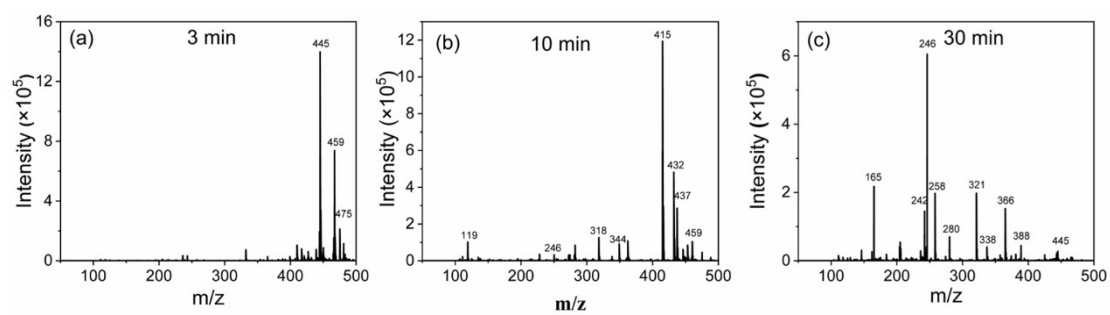

**Fig. S2.** (a-c) Degraded tetracycline mass spectrometry.

**Table S4.** Comparison of adsorption- photocatalysis capacity of tetracycline.

| catalyst                       | pollutant    | Photoreaction time (min) | Catalytic dose (mg) | $q_m$ (mg $g^{-1}$ ) | light source     | removal efficiency | Reference |
|--------------------------------|--------------|--------------------------|---------------------|----------------------|------------------|--------------------|-----------|
| $\beta$ -cyclodextrin/ $Cu_2O$ | Tetracycline | 40                       | 25                  | 90                   | Visible light 45 | 97.0 %             | 1         |
| BC/g- $C_3N_4$                 | Tetracycline | 600                      | 10                  | 130.0                | W LED lamp       | 96.0 %             | 2         |
| Cu-doped $Bi_2O_2S$            | Tetracycline | 30                       | 30                  | 1.75                 | Visible light    | 79 %               | 3         |
| plasma- $TiO_2$                | Tetracycline | 10                       | 15                  | /                    | UV-light 500 W   | 90.2 %             | 4         |
| CdS-N/ $ZnO$                   | Tetracycline | 100                      | 20                  | 22                   | xenon lamp       | 97.0 %             | 5         |
| GCN-Rod                        | Tetracycline | 360                      | 25                  | /                    | Visible light 30 | 100.0 %            | 6         |
| N-deficient g- $C_3N_4$        | Tetracycline | 60                       | 20                  | /                    | W LED lamp       | 85.0 %             | 7         |
| BiOBr/MXene/g- $C_3N_4$        | Tetracycline | 80                       | 25                  | 20                   | Visible light    | 99.0 %             | 8         |

|                                                                         |              |     |     |     |               |         |    |
|-------------------------------------------------------------------------|--------------|-----|-----|-----|---------------|---------|----|
| FeP/Fe single                                                           | Tetracycline | 30  | 7.5 | /   | Visible light | 100.0 % | 9  |
| CN/In <sub>2</sub> S <sub>3</sub>                                       | Tetracycline | 10  | 25  | /   | Visible light | 83.0 %  | 10 |
| g-C <sub>3</sub> N <sub>4</sub> /g-C <sub>3</sub> N <sub>4</sub> -<br>x | Tetracycline | 60  | 50  | /   | Visible light | 88.4 %  | 11 |
| C <sub>3</sub> N <sub>5</sub>                                           | Tetracycline | 100 | 10  | /   | Visible light | 73.5 %  | 12 |
| In <sub>2</sub> S <sub>3</sub> @PCN-<br>224                             | Tetracycline | 40  | 8   | /   | Visible light | 82.0 %  | 13 |
| Cu <sub>2</sub> O/BC                                                    | Tetracycline | 120 | 30  | /   | Visible light | 85.0 %  | 14 |
| MIL-<br>53(Fe)/PVDF                                                     | Tetracycline | 120 | 20  | /   | Visible light | 93.0 %  | 15 |
| In <sub>2</sub> O <sub>3</sub> /AgI                                     | Tetracycline | 10  | 100 | /   | Visible light | 98.4 %  | 16 |
| CdTe/Bi <sub>2</sub> WO <sub>6</sub>                                    | Tetracycline | 135 | 50  | 4.8 | Visible light | 91.5 %  | 17 |
| Fe-g-<br>C <sub>3</sub> N <sub>4</sub> /Bi <sub>2</sub> WO <sub>6</sub> | Tetracycline | 120 | 20  | 7.5 | Visible light | 98.42 % | 18 |
| (CQDs/Bi <sub>2</sub> WO <sub>6</sub>                                   | Tetracycline | 40  | 1   | /   | Visible light | 89.0 %  | 19 |

|                                                                       |              |     |     |        |                     |        |           |
|-----------------------------------------------------------------------|--------------|-----|-----|--------|---------------------|--------|-----------|
| Bi <sub>2</sub> WO <sub>6</sub> /CuBi <sub>2</sub> O <sub>4</sub>     | Tetracycline | 60  | 50  | /      | Visible light       | 91.0 % | 20        |
| Bi <sub>2</sub> WO <sub>6</sub>                                       | Tetracycline | 100 | 50  | /      | Visible light       | 91.0 % | 21        |
| Visible light                                                         | Tetracycline | 100 | 30  | 50     | Visible light 300 W | 95.1 % | 22        |
| Bi <sub>2</sub> WO <sub>6</sub> /BiOI/g-C <sub>3</sub> N <sub>4</sub> | Tetracycline | 60  | 20  | /      | Xenon lamp          | 90.0 % | 23        |
| Ag-doped Bi <sub>2</sub> WO <sub>6</sub> /BiOI                        | Tetracycline | 150 | 20  | 14.6   | Visible light       | 96.2 % | 24        |
| Bi <sub>2</sub> WO <sub>6</sub> /BiOI@Fe <sub>3</sub> O <sub>4</sub>  | Tetracycline | 180 | 2.5 | 2.72   | Visible light       | 97.0 % | 25        |
| BC/BWI                                                                | Tetracycline | 60  | 10  | 227.09 | Visible light       | 99.8 % | This work |

## References

1. H. Wang, X. Quan, Q. Xiong, L. Yin, Y. Tian and J. Zhang, Enhanced performance of  $\beta$ -cyclodextrin modified Cu<sub>2</sub>O nanocomposite for efficient removal of tetracycline and dyes: Synergistic role of adsorption and photocatalysis, *Appl. Sur. Sci.*, 2023, **621**, 156735.
2. H. Zhang, Y. Yu, Y. Li, L. Lin, C. Zhang, W. Zhang, L. Wang and L. Niu, A novel BC/g-C<sub>3</sub>N<sub>4</sub> porous hydrogel carrier used in intimately coupled photocatalysis and

- biodegradation system for efficient removal of tetracycline hydrochloride in water, *Chemosphere*, 2023, **317**, 137888.
3. Y. Xing, X. Jiang, L. Han, X. Jin, G. Ni, Y. Peng, X. Yong and X. Wang, Efficient degradation of tetracycline over vacancy-modified Cu-doped Bi<sub>2</sub>O<sub>2</sub>S via peroxymonosulfate activation and photocatalysis, *J. Clean. Prod.*, 2023, **400**, 136631.
  4. S. Wang, Z. Zhou, R. Zhou, Z. Fang and P. J. Cullen, Highly synergistic effect for tetracycline degradation by coupling a transient spark gas–liquid discharge with TiO<sub>2</sub> photocatalysis, *Chem. Eng. J.*, 2022, **450**, .
  5. W. Gong, X. Wei, Y. Han, S. Subhan, X. Yu, T. Ji, W. Sun, Y. Zhang, Z. Shi, Z. Zhao and Z. Zhao, Photon localization-assisted visible light photocatalysis of photonic crystal CdS-N/ZnO heterojunction for efficient photodegradation tetracycline hydrochloride, *Sep. Purif. Technol.*, 2023, **316**, 138409.
  6. Z. Xu, S. Gong, W. Ji, S. Zhang, Z. Bao, Z. Zhao, Z. Wei, X. Zhong, Z.-T. Hu and J. Wang, Photocatalysis coupling hydrogen peroxide synthesis and in-situ radical transform for tetracycline degradation, *Chemical Engineering Journal*, 2022, **446**, 137009.
  7. H. Sun, F. Guo, J. Pan, W. Huang, K. Wang and W. Shi, One-pot thermal polymerization route to prepare N-deficient modified g-C<sub>3</sub>N<sub>4</sub> for the degradation of tetracycline by the synergistic effect of photocatalysis and persulfate-based advanced oxidation process, *Chem. Eng. J.*, 2021, **406**, 126844.
  8. K. Gao, L.-a. Hou, X. An, D. Huang and Y. Yang, BiOBr/MXene/gC<sub>3</sub>N<sub>4</sub> Z-

- scheme heterostructure photocatalysts mediated by oxygen vacancies and MXene quantum dots for tetracycline degradation: Process, mechanism and toxicity analysis, *Appl. Catal. B: Environ.*, 2023, **323**, 122150.
9. X. Li, J. Hu, Y. Deng, T. Li, Z.-Q. Liu and Z. Wang, High stable photo-Fenton-like catalyst of FeP/Fe single atom-graphene oxide for long-term antibiotic tetracycline removal, *Appl. Catal. B: Environ.*, 2023, **324**, 122243.
  10. J. Zhang, R. Balasubramanian and X. Yang, Novel 3D multi-layered carbon nitride/indium sulfide heterostructure for boosted superoxide anion radical generation and enhanced photocatalysis under visible light, *Chem. Eng. J.*, 2023, **453**, 139776.
  11. C. Feng, X. Ouyang, Y. Deng, J. Wang and L. Tang, A novel g-C<sub>3</sub>N<sub>4</sub>/g-C<sub>3</sub>N<sub>4-x</sub> homojunction with efficient interfacial charge transfer for photocatalytic degradation of atrazine and tetracycline, *J Hazard Mater.*, 2023, **441**, 129845.
  12. C. Fu, T. Wu, G. Sun, G. Yin, C. Wang, G. Ran and Q. Song, Dual-defect enhanced piezocatalytic performance of C<sub>3</sub>N<sub>5</sub> for multifunctional applications, *Appl. Catal. B: Environ.*, 2023, **323**, 122196.
  13. F.-Z. Chen, Y.-J. Li, M. Zhou, X.-X. Gong, Y. Gao, G. Cheng, S.-B. Ren and D.-M. Han, Smart multifunctional direct Z-scheme In<sub>2</sub>S<sub>3</sub>@PCN-224 heterojunction for simultaneous detection and photodegradation towards antibiotic pollutants, *Appl. Catal. B: Environ.*, 2023, **328**, 122517.
  14. Z. Zhang, J. Liang, W. Zhang, M. Zhou, X. Zhu, Z. Liu, Y. Li, Z. Guan, C.-S. Lee, P. K. Wong, H. Li and Z. Jiang, Modified-pollen confined hybrid system: A

- promising union for visible-light-driven photocatalytic antibiotic degradation, *Appl. Catal. B: Environ.*, 2023, **330**, 122621.
15. C.-J. Wu, I. Valerie Maggay, C.-H. Chiang, W. Chen, Y. Chang, C. Hu and A. Venault, Removal of tetracycline by a photocatalytic membrane reactor with MIL-53(Fe)/PVDF mixed-matrix membrane, *Chem. Eng. J.*, 2023, **451**, 138990.
  16. J. Liu, C. Meng, X. Zhang, S. Wang, K. Duan, X. Li, Y. Hu and H. Cheng, Direct Z-scheme  $\text{In}_2\text{O}_3/\text{AgI}$  heterojunction with oxygen vacancies for efficient molecular oxygen activation and enhanced photocatalytic degradation of tetracycline, *Chem. Eng. J.*, 2023, **466**, 143319.
  17. P. Yang, C. Chen, D. Wang, H. Ma, Y. Du, D. Cai, X. Zhang and Z. Wu, Kinetics, reaction pathways, and mechanism investigation for improved environmental remediation by 0D/3D  $\text{CdTe}/\text{Bi}_2\text{WO}_6$  Z-scheme catalyst, *Appl. Catal. B: Environ.*, 2021, **285**, 119877.
  18. C. Liu, H. Dai, C. Tan, Q. Pan, F. Hu and X. Peng, Photo-Fenton degradation of tetracycline over Z-scheme  $\text{Fe-g-C}_3\text{N}_4/\text{Bi}_2\text{WO}_6$  heterojunctions: mechanism insight, degradation pathways and DFT calculation, *Appl. Catal. B: Environ.*, 2022, **310**, 121326.
  19. H. Ren, F. Qi, A. Labidi, J. Zhao, H. Wang, Y. Xin, J. Luo and C. Wang, Chemically bonded carbon quantum dots/ $\text{Bi}_2\text{WO}_6$  S-scheme heterojunction for boosted photocatalytic antibiotic degradation: Interfacial engineering and mechanism insight, *Appl. Catal. B: Environ.* 2023, **330**, 122587.
  20. X. Yuan, D. Shen, Q. Zhang, H. Zou, Z. Liu and F. Peng, Z-scheme



- $\text{Bi}_2\text{WO}_6/\text{CuBi}_2\text{O}_4$  heterojunction mediated by interfacial electric field for efficient visible-light photocatalytic degradation of tetracycline, *Chem. Eng. J.*, 2019, **369**, 292-301.
21. Y. Li, Y. Wu, H. Jiang and H. Wang, In situ stable growth of  $\text{Bi}_2\text{WO}_6$  on natural hematite for efficient antibiotic wastewater purification by photocatalytic activation of peroxymonosulfate, *Chem. Eng. J.*, 2022, **446**, 136704.
  22. W. Gao, G. Li, Q. Wang, L. Zhang, K. Wang, S. Pang, G. Zhang, L. Lv, X. Liu, W. Gao, L. Sun, Y. Xia, Z. Ren and P. Wang, Ultrathin porous  $\text{Bi}_2\text{WO}_6$  with rich oxygen vacancies for promoted adsorption-photocatalytic tetracycline degradation, *Chem. Eng. J.*, 2023, **464**, 142694.
  23. Y. Chu, J. Fan, R. Wang, C. Liu and X. Zheng, Preparation and immobilization of  $\text{Bi}_2\text{WO}_6/\text{BiOI}/\text{g-C}_3\text{N}_4$  nanoparticles for the photocatalytic degradation of tetracycline and municipal waste transfer station leachate, *Sep. Purif. Technol.*, 2022, **300**, 121867.
  24. X. Zheng, Y. Chu, B. Miao and J. Fan, Ag-doped  $\text{Bi}_2\text{WO}_6/\text{BiOI}$  heterojunction used as photocatalyst for the enhanced degradation of tetracycline under visible-light and biodegradability improvement, *J. Alloy. Compd.*, 2022, **893**, 162382.
  25. Z. Mengting, T. A. Kurniawan, Y. Yanping, M. H. Dzarfan Othman, R. Avtar, D. Fu and G. H. Hwang, Fabrication, characterization, and application of ternary magnetic recyclable  $\text{Bi}_2\text{WO}_6/\text{BiOI}/\text{Fe}_3\text{O}_4$  composite for photodegradation of tetracycline in aqueous solutions, *J. Environ. Manage.*, 2020, **270**, 110839.
